# Supplementary material for: Chronic Kidney Disease Diets for Kidney Failure Prevention: Insights from the IL-11 Paradigm
Source: MDPI journal article supplement (doi:10.3390/nu16091342), 2024-04-29
Supplement: s1 [file s1]

## **Supplementary Materials**

### **Content:**

- 1. Abbreviations in the Tables**
- 2. Legend for nutrients used in the Figures.**
- 3. Table S1**
- 4. Table S2**
- 5. Table S3**

### **1. Abbreviations in the Tables**

#### **Statistics:**

n, number of participants who completed study;

NI, not indicated;

NSD, no significant difference;

C, Control

M, Men/Male =; Women/Female = F

#### **Assessments:**

CRP: C-Reactive Protein

eGFR: Estimated Glomerular Filtration Rate

HDL: High Density Lipoprotein

LDL: Low Density Lipoprotein

PDS: Plant-Diet Score used to assess adherence to a plant-based diet, where higher scores indicate a higher proportion of plant-based foods in one's diet

TG: Triglycerides

QOL, Quality of Life

UC: Usual Care

UACR: Urine Albumin to Creatinine Ratio

UP: Urinary Protein

#### **Diets-related:**

ALA:  $\alpha$ -Linolenic Acid

DASH: Dietary Approach to Stop Hypertension

DHA: Docosahexaenoic Acid

EPA: Eicosapentaenoic Acid

erMedDiet: Energy Reduced Mediterranean Diet

FV: Fruit/Vegetable Diet

HDP: Health Dietary Pattern

HEI: Healthy Eating Index

LFD: Low-Fat Diet

mKIDMED: Mediterranean Diet for Children and Young Adults

OO: Olive Oil

SD: Standard Therapeutic Diet (usually Low-Protein Diet for CKD)

SD/UD: Standard/Usual Diet

tMedDiet: Trichopoulou Mediterranean Diet

UD: Usual Diet (average diet for individuals in the country of study)

#### **Diseases:**

CKD: Chronic Kidney Disease

CVD: Cardiovascular Disease

DM: Diabetes

DLD: Dyslipidemia

ESRD: End-Stage Renal Disease

HD: Hemodialysis  
 HTN: Hypertension  
 MetS: Metabolic Syndrome  
 PD: Peritoneal Dialysis  
 T1DM: Type 1 Diabetes  
 T2DM: Type 2 Diabetes

## 2. Legend for nutrients used in the Figures.

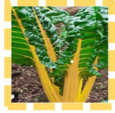

**Golden Swiss chard source** for lutein and zeaxanthin and with lower content of oxalates

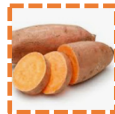

**Sweet potato source** for provitamin A

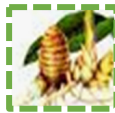

**Turmeric source** for curcumin

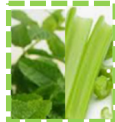

**Mint and celery source** for terpenoid β-elemene

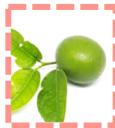

**Lime (*Rutaceae* families) source** for a coumarin derivative osthole and quercetin

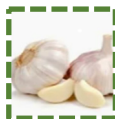

**Garlic source** for sulfur-containing compound allicin

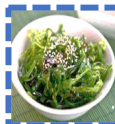

**Algae source** for ω3 fatty acids DHA and EPA

**Table S1.** Clinical Trials Involving Dietary Patterns, Foods, and Nutrients That Might Prevent CKD Development in Populations at Risk.

Diet adherence or in protein diet score from baseline to 1 year in 4 groups: 1) Decrease/ Maintain, 2) T1, Lowest tertile increase/adherence, 3) T2, Middle tertile increase/adherence, 4) T3, Highest tertile increase/adherence.

| Diet                    | Outcome                                                              | Duration | Baseline CKD Stage & Non-CKD Conditions/Criteria | Source                    |
|-------------------------|----------------------------------------------------------------------|----------|--------------------------------------------------|---------------------------|
| MedDiet/OO<br>(n=214)   | All improved kidney function,<br>↑ eGFR<br><br>NSD in MedDiet vs LFD | 1 y      | No CKD<br><br>CVD risk but no CVD                | {Diaz-Lopez,<br>2012 #91} |
| MedDiet/nuts<br>(n=227) |                                                                      |          |                                                  |                           |
| LFD Control<br>(n=224)  |                                                                      |          |                                                  |                           |

|                                                                                                             |                                                   |                               |                                                                             |                           |
|-------------------------------------------------------------------------------------------------------------|---------------------------------------------------|-------------------------------|-----------------------------------------------------------------------------|---------------------------|
| MedDiet/OO<br>(n=1,282)                                                                                     | 64 cases of DM nephropathy,<br>NSD                |                               |                                                                             |                           |
| MedDiet/nuts<br>(n=1,142)                                                                                   | 51 cases of DM nephropathy,<br>NSD                | 6 y                           | No CKD<br><br>T2DM, CVD risk but no CVD                                     | {Diaz-Lopez,<br>2015 #92} |
| LFD (C)<br>(n=1,190)                                                                                        | 53 cases of DM nephropathy,<br>NSD                |                               |                                                                             |                           |
| erMedDiet, T3*<br>(n=1,423 of 5,675)                                                                        | ↓ risk eGFR decline, larger ↑<br>eGFR             |                               |                                                                             |                           |
| TMedDiet, T3*<br>(n=534 of 5,675)                                                                           | NSD renal outcomes                                | 1 y                           | No CKD                                                                      | {Valle-Hita,<br>2022 #95} |
| DASH, T3*<br>(n=852 of 5,675)                                                                               | NSD renal outcomes                                |                               | MetS, BMI of 27-40 kg/m2, no<br>CVD, no extreme high/low<br>caloric intake. |                           |
| PDS, T3*<br>(n= 98 of 5,675)                                                                                | ↑ risk eGFR decline, larger ↓<br>eGFR             |                               |                                                                             |                           |
| DASH T3* highest<br>adherence vs T1<br>lowest adherence<br>(n=14,882)                                       | ↓ CKD incidence                                   |                               |                                                                             |                           |
| Red meat,<br>processed meat, and<br>protein, Q5 high<br>intake vs Q1 low<br>intake<br>(n=14,882)            | ↑ CKD incidence                                   | 25 y                          | No CKD                                                                      | {Rebholz,<br>2016 #93}    |
| Nuts, legumes, LF<br>dairy, magnesium,<br>and calcium, Q5<br>high intake vs Q1<br>low intake.<br>(n=14,882) | ↓ CKD incidence                                   |                               | Selected communities, majority<br>African- American or Caucasian            |                           |
| DASH T3 highest<br>adherence vs T1<br>lowest adherence<br>(n=584 of 2,058)                                  | ↑ CKD risk only significant in<br>poverty group   |                               |                                                                             |                           |
| <i>n=869 with poverty</i>                                                                                   | CKD in 5.6% of participants<br>with poverty       | Non-temporal<br>data analysis | Urban community, 42% with<br>poverty                                        | {Crews, 2015<br>#100}     |
| <i>n= 1,189 non-<br/>poverty</i>                                                                            | No CKD in 3.8% of<br>participants without poverty |                               |                                                                             |                           |
| mKIDMED, higher<br>scores<br>(n=461)                                                                        | NSD of developing<br>microalbuminuria             | Varies,                       | No CKD<br><br>Youth onset T1DM.                                             | {Costacou,<br>2018 #94}   |

|                                                                                                                                                                                                                 |                                                                                                                                                                                                                                                                                      |                                           |                                                                                                    |                        |
|-----------------------------------------------------------------------------------------------------------------------------------------------------------------------------------------------------------------|--------------------------------------------------------------------------------------------------------------------------------------------------------------------------------------------------------------------------------------------------------------------------------------|-------------------------------------------|----------------------------------------------------------------------------------------------------|------------------------|
| DASH, higher scores<br>(n=462)<br><br>HEI<br>(n=462)                                                                                                                                                            | NSD of developing microalbuminuria<br><br>↓ risk of developing microalbuminuria (borderline significance)                                                                                                                                                                            | ≥5 y. Baseline to follow- up visits       | Age < 18 years at start of study.                                                                  |                        |
| DASH 18% protein<br>(n=127)<br><br>FV 15% protein<br>(n=124)<br><br>UD 15% protein (C)<br>(n=120)                                                                                                               | NSD ( <i>Lack of ↑ AER despite 3% more protein kcal suggests it may be protective</i> ).<br><br>↓ urinary albumin excretion rate (AER) only when baseline is higher than normal AER.                                                                                                 | 8 wks                                     | No CKD<br><br>Pre-hypertension or stage 1 hypertension. No DM                                      | {Jacobs, 2009 #102}    |
| FV (Based on serum carotenoid biomarker for FV diet)<br>(n=2,152)                                                                                                                                               | ↓ incidence of rapid kidney decline (> 15% eGFR decline in 5 yrs)<br><br><i>Insufficient cases of incident CKD at year 20 for analysis</i>                                                                                                                                           | 5 y<br><br>(eGFR data from years 15 & 20) | No CKD<br><br>Serum carotenoid at year 15 of study                                                 | {Hirahatake, 2019 #96} |
| Meta-analysis of HDP*<br>(n=630,108 across 18 studies)                                                                                                                                                          | ↓ incidence of CKD & microalbuminuria<br><br>NSD eGFR decline                                                                                                                                                                                                                        | 2-23 y                                    | No CKD<br><br>N/A                                                                                  | {Bach, 2019 #98}       |
| Meta-analysis of HDP* & light-moderate alcohol intake<br>(n=149,958 across 17 studies)                                                                                                                          | ↓ risk of CKD HDP                                                                                                                                                                                                                                                                    | NI                                        | No CKD<br><br>N/A                                                                                  | {He, 2021 #99}         |
| Omega-3 400 mg/day EPA/ DHA in margarine<br>(n=576)<br><br>Omega-3 2 g/day ALA in margarine<br>(n=601)<br><br>Omega-3 400 mg/day EPA/ DHA / 2 g/day ALA in margarine<br>(n=574)<br>Margarine placebo<br>(n=593) | Long-term EPA/ DHA supplements:<br>Small benefits for kidney function with slower annual decline in eGFR.<br>More significant benefits in patients with CKD than without.<br><br>NSD in incident CKD or rapid kidney function decline.<br><br>ALA supplement: NSD in kidney function | 40 mo                                     | Early or no CKD<br><br>History of myocardial infarction, at risk for CKD, mean eGFR 78.5 mL/ min). | {Hoogeveen, 2014 #175} |

|                                                                                                                                  |                                                                                                                                       |                 |                                        |                    |
|----------------------------------------------------------------------------------------------------------------------------------|---------------------------------------------------------------------------------------------------------------------------------------|-----------------|----------------------------------------|--------------------|
| Meta- analysis of Omega 3 FA (seafood or plants) (n=25,570 across 19 studies)                                                    | ↑ Omega 3 from seafood:<br>↓ risk of CKD & slower annual decline in eGFR.<br>↑ Omega 3 from plants: NSD                               | Median 11.3 hrs | No CKD<br>N/A (eGFR > 60 mL/min).      | {Ong, 2023 #176}   |
| Extra virgin OO with high oleic acid and phenolic content. (n=29)<br>Refined OO with low oleic acid and phenolic content. (n=34) | Both showed improved coronary artery disease biomarkers. No change CKD, CVD, or DM biomarkers.<br><i>NSD high vs. low phenolic OO</i> | 6 wks           | No CKD<br>Non. Self-reported, healthy. | {Silva, 2015 #101} |

**Table S2.** Clinical Trials Involving Studies of Dietary Patterns, Foods, and Nutrients That Might Prevent CKD Progression.

| Diet                                                                                                           | Outcome                                                                                                                                                               | Duration | Baseline CKD Stage, eGFR, Albuminuria, or Proteinuria | Other Criteria                               | Source                  |
|----------------------------------------------------------------------------------------------------------------|-----------------------------------------------------------------------------------------------------------------------------------------------------------------------|----------|-------------------------------------------------------|----------------------------------------------|-------------------------|
| MedDiet:<br>LPD for ≥ 6 mo (baseline),<br>then IMD for 14 d, (n=40)<br>then IMOD for 14d (n=40, same as prior) | IMD & IMOD:<br>↓ hyperphosphatemia,<br>↓ BMI<br>↓ DLD<br>↓ CVD risk<br><br>IMOD additional observation:<br>↑ lean muscle mass<br>↓ albuminuria.                       | 28 d     | Stage 2-3, NI                                         | Only chronic glomerulonephritis              | {Di Daniele, 2014 #222} |
| MedDiet (after LFD baseline) (n=21)<br><br>Continue LFD (C) (n=16)                                             | ↓ DLD<br>↓ Oxidative stress<br>↓ CVD risk                                                                                                                             | 6 mo     | ESRD, NI, NI                                          | Renal transplant, stable                     | {Stachowska, 2005 #126} |
| MedDiet (n=20)<br><br>SD (C) (n=20)                                                                            | ↑ food consumption, improved CVD and nutritional states<br><br>↓ DLD and inflammation                                                                                 | 90 d     | Stage G2                                              | DLD, no DM                                   | {Mekki, 2010 #224}      |
| NNRD for 1 wk, washout for 1-3 wks (n=18)<br><br>UD (C) for 1 wk (or vice versa) (n=18 same as prior)          | ↓ metabolic acidosis, urinary excretion of uremic toxins, indoxyl sulfate, & p-cresyl sulfate                                                                         | 3-6 wks  | Stage 3b-4, NI                                        | Stable CKD                                   | {Hansen, 2023 #115}     |
| NNRD for 1 wk, washout for 1-3 wks (n=18)<br><br>UD (C) for 1 wk (or vice versa) (n=18 same as prior)          | ↓ urinary excretion of phosphorus, urea nitrogen<br>↓ plasma intact FGF23, normalized plasma phosphorus<br><br><i>NNRD is well tolerated</i>                          | 3-6 wks  | Stage 3b-4, NI                                        | Stable CKD                                   | {Salomo, 2019 #122}     |
| Vegetarian SVLPD (n=27)<br><br>SD (C) (n=26)                                                                   | ↓ serum urea, improved acid-base, improved calcium-phosphorus metabolism, stable eGFR<br><br>↓ initiation of renal replacement therapy, maintained nutritional status | 48 wks   | Stage 4-5, NI                                         | Non-diabetic, well-controlled BP, stable CKD | {Mircescu, 2007 #107}   |
| FV dosed to decrease dietary acid by half.                                                                     | Improved metabolic acidosis, stable eGFR                                                                                                                              | 5 y      | Stage 3, UACR > 200 mg/g                              | HTN, no DM, CKD with                         | {Goraya, 2019 #112}     |

|                                                                           |                                                                                                                                                                                                                                                                                                                                                                                            |      |                                      |                                                                                                                          |                           |
|---------------------------------------------------------------------------|--------------------------------------------------------------------------------------------------------------------------------------------------------------------------------------------------------------------------------------------------------------------------------------------------------------------------------------------------------------------------------------------|------|--------------------------------------|--------------------------------------------------------------------------------------------------------------------------|---------------------------|
| (n=36)                                                                    | <p>+</p> <p>Improved CVD risk factors, including</p> <p>↓ systolic BP</p> <p>↓ LDL</p> <p>↓ BMI</p> <p>↑ serum Vitamin K</p>                                                                                                                                                                                                                                                               |      |                                      | macroalbuminuria<br>minuria.<br>Metabolic acidosis<br>(PTCO <sub>2</sub> = 22-24<br>mM)                                  |                           |
| Oral Sodium<br>Bicarbonate<br>(n=36)                                      | Improved metabolic acidosis, stable<br>eGFR                                                                                                                                                                                                                                                                                                                                                |      |                                      |                                                                                                                          |                           |
| UC (C)<br>(n=36)                                                          |                                                                                                                                                                                                                                                                                                                                                                                            |      |                                      |                                                                                                                          |                           |
| FV dosed to decrease<br>dietary acid by half<br>(n=36)                    | <p>Improved metabolic acidosis, stable<br/>eGFR,</p> <p>↓ urine indices of kidney injury</p> <p>+</p> <p>↓ systolic BP and BMI</p> <p><i>Note: No ↑ risk for hyperkalemia but ↑<br/>potassium urinary excretion, so<br/>potential hyperkalemia if low eGFR or<br/>other risk factors.</i></p> <p>Improved metabolic acidosis, stable<br/>eGFR and ↓ urine indices of kidney<br/>injury</p> | 1 y  | Stage 4, NI                          | HTN, no DM.<br>Metabolic acidosis<br>(PTCO <sub>2</sub> < 22 mM)                                                         | {Goraya,<br>2013 #113}    |
| Oral Sodium<br>Bicarbonate (n=35)                                         |                                                                                                                                                                                                                                                                                                                                                                                            |      |                                      |                                                                                                                          |                           |
| FV dosed to decrease<br>dietary acid by half<br>(n=26 CKD1, n=40<br>CKD2) | <p>↓ urine indices of kidney injury &amp;<br/>stable eGFR in CKD2 but not in<br/>CKD1.</p> <p>+</p> <p>↓ systolic BP &amp; ↓ BMI in both CKD1 &amp;<br/>CKD2.</p>                                                                                                                                                                                                                          | 30 d | Stage 1-2, uACR > 200<br>mg/g        | Early CKD due to<br>HTN with<br>macroalbuminuria.<br>No DM or<br>metabolic acidosis<br>(PTCO <sub>2</sub> ≥ 24.5<br>mM). | {Goraya,<br>2012 #114}    |
| Oral Sodium<br>Bicarbonate (n=26<br>CKD1, n=40 CKD2)                      | ↓ urine indices of kidney injury &<br>stable eGFR in CKD2 but not in<br>CKD1.                                                                                                                                                                                                                                                                                                              |      |                                      |                                                                                                                          |                           |
| Time Control<br>(n=27 CKD1,<br>n=40 CKD2)                                 |                                                                                                                                                                                                                                                                                                                                                                                            |      |                                      |                                                                                                                          |                           |
| Soy protein (35% soy,<br>35% animal, 30%<br>vegetable)<br>(n=20)          | <p>↓ urinary creatinine</p> <p>↓ urea nitrogen, but no change in<br/>eGFR.</p>                                                                                                                                                                                                                                                                                                             | 4 y  | Stage 1-2, NI, UP<br>mean 513 mg/day | Diabetic nephro-<br>pathy, T2DM,<br>proteinuria, HTN.                                                                    | {Azadbakht,<br>2008 #110} |
| Animal protein (C)<br>(70% animal, 30%<br>vegetable)<br>(n=21)            | <p>Improved lipid profile,</p> <p>↓ glucose, but no change in BP.</p>                                                                                                                                                                                                                                                                                                                      |      |                                      |                                                                                                                          |                           |

|                                                                               |                                                                                                                                                                                                       |        |                                 |                                                                        |                         |
|-------------------------------------------------------------------------------|-------------------------------------------------------------------------------------------------------------------------------------------------------------------------------------------------------|--------|---------------------------------|------------------------------------------------------------------------|-------------------------|
| Soy LPD for 6 months (n=9)                                                    | ↓ rate CKD progression & similar nutrition status.<br>+<br>↓ BUN, urine urea nitrogen, protein catabolic rate, 24-h urine creatinine & phosphate.<br>↓ protein & phosphate intake<br>↑ caloric intake | 1 y    | Stage G3a-4, UP mean 1.2 g/day. | N/A                                                                    | {Soroka, 1998 #106}     |
| then Standard Diet for 6 months (or vice versa) (n=9 same as prior)           | ↓ rate CKD progression & similar nutrition status.                                                                                                                                                    |        |                                 |                                                                        |                         |
| Soy-based protein for 8 wks, (n=12)                                           | ↓ eGFR (↓ hyperfiltration) & improved lipid profile.                                                                                                                                                  | 20 wks | Stage 1, > 120, UP > 300 mg/day | T1DM diabetic nephropathy with hyperfiltration. Good glycemic control. | {Stephenson, 2005 #111} |
| then animal-based protein for 8 wks (or vice versa) (n=12, same as prior)     |                                                                                                                                                                                                       |        |                                 |                                                                        |                         |
| Soy-based protein supplement (n=15)                                           | Individuals:<br>↓ markers of inflammation,<br>↑ markers of nutrition                                                                                                                                  | 8 wks  | ESRD, NI, NI                    | HD > 4 mo. ≥ marker of inflammation                                    | {Fanti, 2006 #121}      |
| Milk-based protein supplement (C) (n=10)                                      | Group level:<br>NSD in inflammation or nutrition                                                                                                                                                      |        |                                 |                                                                        |                         |
| Soy protein (n=18)                                                            | ↓ CVD risk with<br>↓ Lp(a).                                                                                                                                                                           | 8 wks  | ESRD, NI, NI                    | PD                                                                     | {Tabibi, 2010 #132}     |
| UD, no soy (C) (n=18)                                                         | NSD in TC, LDL, HDL, or TG.                                                                                                                                                                           |        |                                 |                                                                        |                         |
| Soy protein (n=18)                                                            | ↓ thrombosis risk with<br>↓ plasma coagulation factor IX.                                                                                                                                             | 8 wks  | ESRD, NI, NI                    | PD                                                                     | {Imani, 2009 #133}      |
| UD, no soy (C) (n=18)                                                         | NSD ox-LDL, fibrinogen, or coagulation factors VII and X.                                                                                                                                             |        |                                 |                                                                        |                         |
| Cereal, cookies, and bars without added fiber (C) for 2 wks, (n=15)           |                                                                                                                                                                                                       | 6 wks  | Stage 3-5, NI                   | N/A                                                                    | {Salmean, 2013 #125}    |
| then similar food with added fiber (23 g/day) for 4 wks (n=15, same as prior) | ↓ constipation with ↑ stool frequency, improved lipid profile, & no change in overall QOL.                                                                                                            |        |                                 |                                                                        |                         |

|                                                                                                                                                                                                                                                |                                                                                                                                                                            |                            |                         |                                                                  |                             |
|------------------------------------------------------------------------------------------------------------------------------------------------------------------------------------------------------------------------------------------------|----------------------------------------------------------------------------------------------------------------------------------------------------------------------------|----------------------------|-------------------------|------------------------------------------------------------------|-----------------------------|
| Freshly squeezed pomegranate juice (PJ) for 8 weeks, (n=41)<br><br>then washout for 4 weeks, and UC for 8 weeks (or vice versa) (n=41, same as prior)                                                                                          | ↓ BP, triglycerides.<br>↑ HDL.<br><br>Signs of ↓ oxidative stress (e.g., ↑ total antioxidant capacity) & ↓ inflammation (e.g., ↓ IL-6).                                    | 20 wks                     | ESRD, NI, NI            | HD ≥ 3 mo                                                        | {Barati Boldaji, 2020 #128} |
| Fish oil (4.6 g n-3) supplement (n=14)<br><br>OO supplement (n=15)                                                                                                                                                                             | Both:<br>↑ fibrinolytic potential after 6 months.<br>No change in transcapillary escape rate of albumin or procoagulant activity.                                          | 1 y                        | NI, NI, UA > 300 mg/day | Diabetic nephropathy with albuminuria.<br>Insulin- dependent DM. | {Myrup, 2001 #135}          |
| MedDiet, T3* (n=2,403)<br><br>DASH, T3* (n=2,403 same as prior)<br><br>HEI 2015, T3* (n=2,403, same as prior)<br><br>Alternative HEI 2010* (n=2,403 same as prior)<br><br>Intake of vegetables & nuts in MedDiet, T3* (n=2,403, same as prior) | MedDiet, DASH, HEI 2015, HEI 2010:<br>↓ risk of CKD progression*, and risk of all-cause mortality<br><br><br><br><br>* Defined as eGFR decline > 50% from baseline or ESRD | Max 14 y                   | Stage 2-4, Various      | N/A                                                              | {Hu, 2021 #108}             |
| Overall diet quality (n = 68, n = 40 in optional fecal sub-study)<br><br>Fiber intake, highest scores (n = 68)<br><br>Healthy plant-based diet index (hPDI), highest scores (n = 68)                                                           | Affects microbiome & production of uremic toxins<br><br>↓ total indoxyl sulfate<br><br>↓ free p-cresyl sulfate                                                             | Non-temporal data analysis | Stage 3-4, NI           | Stable CKD                                                       | {McFarlane, 2022 #124}      |
| Meta-analysis of HDP* (n=15,285 across 7 studies)                                                                                                                                                                                              | ↓ risk of mortality<br><br>NSD risk of ESRD                                                                                                                                | ≥ 24 wks                   | Stage 2-5, NI           | One study eGFR 20-70 mL/min, and one study ESRD HD.              | {Kelly, 2017 #136}          |

|                                                                                                  |                                                                                                                        |                            |               |     |                      |
|--------------------------------------------------------------------------------------------------|------------------------------------------------------------------------------------------------------------------------|----------------------------|---------------|-----|----------------------|
| Plant-Based Protein, Q5*<br>(n=588 of 2,938)<br><br><i>*Q5 indicates highest % plant protein</i> | ↓ urinary creatinine, urea nitrogen, but no change in eGFR.<br>Improved lipid profile, ↓ glucose, but no change in BP. | Non-temporal data analysis | Stage 2-4, NI | N/A | {Scialla, 2012 #117} |
|--------------------------------------------------------------------------------------------------|------------------------------------------------------------------------------------------------------------------------|----------------------------|---------------|-----|----------------------|

Supplementary Table S3. Clinical Trials Involving Studies of Other Nutrients That Might Prevent CKD Progression.

| Nutrient                                                                                                        | Outcome                                                                                                                                                   | Duration | Baseline CKD Stage & Non-CKD Conditions/Criteria                                                                  |     | Source                 |
|-----------------------------------------------------------------------------------------------------------------|-----------------------------------------------------------------------------------------------------------------------------------------------------------|----------|-------------------------------------------------------------------------------------------------------------------|-----|------------------------|
| VLCKD (n=92)<br><br>Note: Meal replacement protein sources are whey and plant- based and never > 1.5 g/kg IBW/d | Safe and effective weight loss, significant proportion of stage G2 CKD resolved to normal eGFR (Stage G2),<br><br>↓ BMI, TG, & improved metabolic profile | 3 mo     | Stage 2<br><br>Obesity and early (Stage G2) (n=38)<br><br>Obesity and no CKD (Stage G1, control). (n=54)          |     | {Bruci, 2020 #268}     |
| VLCKD and exercise (n=6*)<br><br>*1 participant completed only 7 weeks but was still included in analyses       | Improved DM status, 36% reduction in albuminuria but not significant, ↓ creatinine and BMI                                                                | 12 wks   | Stage 3-4<br><br>Advanced diabetic nephropathy with obesity, non-dialysis (eGFR < 40 mL/ min and UA > 30 mg/d) DM |     | {Friedman, 2013 #269}  |
| Resveratrol 500 mg supplement for 4 weeks, washout for 8 weeks, oral placebo for 4 weeks or vice versa (n=20)   | NSD in uremic toxins produced by gut microbiota                                                                                                           | 16 wks   | Stage 3-4<br><br>Non-dialysis with eGFR < 60 mL/min. Low protein diet at least 6 mo before intervention.          |     | {Alvarenga, 2022 #263} |
| Resveratrol 500 mg supplement for 4 weeks, washout for 8 weeks, oral placebo for 4 weeks or vice versa (n=20)   | NSD on Nfr2 or NF-κB expressions and no antioxidant or anti-inflammatory effects.                                                                         | 16 wks   | Stage 3-4<br><br>Non-dialysis with eGFR 15- 60 mL/min.                                                            |     | {Saldanha, 2016 #264}  |
| Cereal, cookies, and bars without added fiber (C) for 2 wks, (n=15)                                             |                                                                                                                                                           | 6 wks    | Stage 3-5, NI                                                                                                     | N/A | {Salmean, 2013 #125}   |

|                                                                                                                                                       |                                                                                                                                      |        |                         |                                                               |                             |
|-------------------------------------------------------------------------------------------------------------------------------------------------------|--------------------------------------------------------------------------------------------------------------------------------------|--------|-------------------------|---------------------------------------------------------------|-----------------------------|
| then similar food with added fiber (23 g/day) for 4 wks (n=15, same as prior)                                                                         | ↓ constipation with ↑ stool frequency, improved lipid profile, & no change in overall QOL.                                           |        |                         |                                                               |                             |
| Freshly squeezed pomegranate juice (PJ) for 8 weeks, (n=41)<br><br>then washout for 4 weeks, and UC for 8 weeks (or vice versa) (n=41, same as prior) | ↓ BP, triglycerides. ↑ HDL.<br><br>Signs of ↓ oxidative stress (e.g., ↑ total antioxidant capacity) & ↓ inflammation (e.g., ↓ IL-6). | 20 wks | ESRD, NI, NI            | HD ≥ 3 mo                                                     | {Barati Boldaji, 2020 #128} |
| Fish oil (4.6 g n-3) supplement (n=14)<br><br>OO supplement (n=15)                                                                                    | Both: ↑ fibrinolytic potential after 6 months. No change in transcapillary escape rate of albumin or procoagulant activity.          | 1 y    | NI, NI, UA > 300 mg/day | Diabetic nephropathy with albuminuria. Insulin- dependent DM. | {Myrup, 2001 #135}          |
